# Supplementary material for: Organogel formation rationalized by Hansen solubility parameters: dos and don'ts
Source: Royal Society of Chemistry journal article supplement (doi:10.1039/c4sm00244j), 2014-01-01
Supplement: c4sm00244j1.zip [file c4sm00244j1.zip]

## Sheet: Jamart2011
	data:	Jamart et al. Chem. Eur. J. 2011, 17, 13603 (LMWG 1a)
	procedure:	Gharagheizi et al. J. Appl. Polym. Sci. 2007, 103, 32
							centre of the gelation sphere			radius of the gelation sphere
							delta d	delta p	delta h	Rgel	objective
							(MPa0.5)	(MPa0.5)	(MPa0.5)	(MPa0.5)
							18.8	2.86	2.2	3.8	0
	1) fill the list of liquids	2) indicate the results of the solubility test	3) value is 1 if gel, 0 otherwise	4) indicate HSPs of liquids			5) use the Solver function to adjust the values of the centre and radius of the gelation sphere, in order to minimize the "objective"
							6) repeat this step with other initial values of the centre and radius to check the robustness of the minimization
									datafit	number of liquids
								distance to the centre	1	32
	liquid	solubility	S or I=0, G=1	delta d	delta p	delta h		d gel	A(i)	n
				(MPa0.5)	(MPa0.5)	(MPa0.5)		(MPa0.5)
1	Nitrobenzene	S	0	20	10.6	3.1		8.15338	1	1
2	Dichloromethane	S	0	17	7.3	7.1		7.52885	1	1
3	Chloroform	S	0	17.8	3.1	5.7		4.03827	1	1
4	Methanol	S	0	14.7	12.3	22.3		23.672	1	1
5	Ethanol	S	0	15.8	8.8	19.4		19.1605	1	1
6	Methyl acetate	S	0	15.5	7.2	7.6		9.56847	1	1
7	Ethyl acetate	S	0	15.8	5.3	7.2		8.18252	1	1
8	Tetrahydrofuran	S	0	16.8	5.7	8		7.59642	1	1
9	Acetone	S	0	15.5	10.4	7		11.1109	1	1	0	3.8
10	Dimethyl sulfoxide	S	0	18.4	16.4	10.2		15.7471	1	1	33	3.8
11	Acetonitrile	S	0	15.3	18	6.1		17.1298	1	1
12	Dimethylformamide	S	0	17.4	13.7	11.3		14.4276	1	1
13	4-Methyl-pentan-2-one	S	0	15.3	6.1	4.1		7.94403	1	1
14	ethyl propionate	S	0	15.5	6.1	4.9		7.83247	1	1
15	cyclopentanone	S	0	17.9	11.9	5.2		9.69338	1	1
16	1.2-dichloroethane	P	0	18	7.4	4.1		5.17509	1	1
17	n-Octane	I	0	15.5	0	0		7.52194	1	1
18	Cyclohexane	I	0	16.8	0	0.2		5.30845	1	1
19	Carbon tetrachloride	I	0	17.8	0	0.6		3.83922	1	1
20	Diethyl ether	I	0	14.5	2.9	4.6		8.9287	1	1
21	Water	I	0	15.5	16	42.3		42.711	1	1
22	diisopropyl ether	I	0	15.1	3.2	3.2		7.475	1	1
23	Benzene	G	1	18.4	0	2		2.97651	1	1
24	Toluene	G	1	18	1.4	2		2.17522	1	1
25	Ethylbenzene	G	1	17.8	0.6	1.4		3.12211	1	1
26	p-diethylbenzene	G	1	18	0	0.6		3.64686	1	1
27	Chlorobenzene	G	1	19	4.3	2		1.50785	1	1
28	Tetraline	G	1	19.6	2	2.9		1.94669	1	1
29	1-Methylnaphthalene	G	1	19.7	0.8	4.7		3.70589	1	1
30	Tetrachloroethylene	G	1	18.3	5.7	0		3.72902	1	1
31	p-xylene	G	1	17.8	1	3.1		2.87569	1	1
32	o-diethylbenzene	G	1	17.7	0.1	1		3.72795	1	1
